# Supplementary material for: Crowdsourced online data as evidence of absence of non-target effects from the century-old introduction of Istocheta aldrichi for biological control of Popillia japonica in North America
Source: Research Square preprint supplement (doi:10.21203/rs.3.rs-5883525/v1), 2025-02-10
Supplement: Supplementary file 1 [file a43c16d642b52f726881f134.xlsx]

## Sheet: Taxonomic notes
Online Resource 2 – Notes on taxonomic classifications Crowdsourced online data as evidence of absence of non-target effects from the century-old introduction of Istocheta aldrichi for biological control of Popillia japonica in North America Journal of Pest Science Victoria Makovetski (1,2), Andrew B.T. Smith (3), Paul K. Abram (1)* 1 Agriculture and Agri-Food Canada, Agassiz Research and Develop…
Genus	Identification notes	Data handling result
Amphimallon	A. majale is the only species in this genus in the study area	All genus-level identifications were changed to A. majale
Anomala	There is more than one species in the study area; they are identifiable to species based on photographs	No changes made.
Aphonus	Only identifiable to genus based on photographs	Changed any species-level identifications to generic-level
Callistethus	C. marginatus is identifiable to species in photographs	No changes made.
Cotalpa	C. lanigera is identifiable to species in photographs	No changes made.
Cotinis	C. nitida is identifiable to species in photographs	No changes made.
Cremastocheilus	Species in this genus cannot usually be confidently identified to specific level using photographs by non-experts	Changed any species-level identifications to generic-level
Cyclocephala	Species in this genus cannot usually be confidently identified to specific level using photographs by non-experts	Changed any species-level identifications to generic-level
Dichelonyx	Species in this genus cannot usually be confidently identified to specific level using photographs by non-experts	Changed any species-level identifications to generic-level
Diplotaxis	Species in this genus cannot usually be confidently identified to specific level using photographs by non-experts	Changed any species-level identifications to generic-level
Dynastes	D. tityus is identifiable to species in photographs	No changes made.
Dyscinetus	Species in this genus cannot usually be confidently identified to specific level using photographs by non-experts	Changed any species-level identifications to generic-level
Euetheola	E. humilis is identifiable to species in photographs.	No changes made.
Euphoria	Species in this genus within the study area can be identified to species based on a photograph.	No changes made.
Exomala	E. orientalis is the only species in this genus in the study area.	All genus-level identifications were changed to E. orientalis
Gnorimella	G. maculosa is identifiable to species in photographs.	No changes made.
Hoplia	Only H. trifasciata is present through much of the study area. Other complicating species are found in the southern areas that cannot be clearly separated using photographs.	Changed any species-level identifications to generic-level
Ligyrus	L. gibbosus can be confused with other species in some parts of the distribution; L. relictus can be identified based on photographs	Changed species-level identifications of L. gibbosus to genus-level identifications; maintained species-level identifications for L. relictus
Macrodactylus	All Canadian records, and most other records, will be M. subspinosus. There is a second species in the eastern U.S. that complicates portions of the study area.	Changed any species-level identifications to generic-level
Maladera	M. formosae is identifiable to species in photographs.	No changes made.
Osmoderma	All will either be O. eremicola or O. scabrum, and they are easy to identify to species using a photograph of sufficient quality.	Species-level identifications retained. Underconfident genera-level identifications retained as well.
Pelidnota	P. punctata is identifiable to species in photographs	No changes made.
Phyllophaga	Species in this genus cannot usually be confidently identified to specific level using photographs by non-experts	Changed any species-level identifications to generic-level
Polyphylla	P. variolosa is the only species in this genus in the study area	All genus-level identifications were changed to P. variolosa
Popillia	P. japonica is the only species in this genus in the study area	No changes made (all identifications were already to species level)
Serica	Species in this genus cannot usually be confidently identified to specific level using photographs by non-experts	Changed any species-level identifications to generic-level
Strategus	There is more than one difficult-to-identify species included in the southern portion of the region	Changed any species-level identifications to generic-level
Strigoderma	Most observations from this genus in the region are likely S. arbicola. However, S. pygmaea, which is difficult to distinguish based on photographs, does skirt the southern end of the study area.	Changed any species-level identifications to generic-level
Trichiotinus	Species in this genus cannot usually be confidently identified to specific level using photographs by non-experts	Changed any species-level identifications to generic-level
Valgus	V. hemipterus is identifiable to species in photographs but the other two species are more difficult.	Retained species-level identifications for V. hemipterus; set any others at generic-level
Xyloryctes	X. jamaicensis is identifiable to species in photographs	No changes made.
