# Supplementary material for: Crowdsourced online data as evidence of absence of non-target effects from the century-old introduction of Istocheta aldrichi for biological control of Popillia japonica in North America
Source: Research Square preprint supplement (doi:10.21203/rs.3.rs-5883525/v1), 2025-02-10
Supplement: Supplementary file 1 [file d9f77de7f50c4003b63694c5.pdf]

## Online Resource 1 – Supplementary Tables

### Crowdsourced online data as evidence of absence of non-target effects from the century-old introduction of *Istocheta aldrichi* for biological control of *Popillia japonica* in North America

#### *Journal of Pest Science*

Victoria Makovetski<sup>1,2</sup>, Andrew B.T. Smith<sup>3</sup>, Paul K. Abram<sup>1\*</sup>

<sup>1</sup> Agriculture and Agri-Food Canada, Agassiz Research and Development Centre, Agassiz, BC, Canada

<sup>2</sup> University of Victoria, Victoria, BC, Canada

<sup>3</sup> Canadian Museum of Nature, Gatineau, QC, Canada

\* Corresponding author; [paul.abram@agr.gc.ca](mailto:paul.abram@agr.gc.ca)

**Table S1.** Accuracy, overconfidence (observations identified to a lower taxonomic level than is possible with a photograph) and underconfidence (observations identified at a higher taxonomic level than possible with a photograph) of subsamples of observations from the Canadian and USA datasets, as determined by a taxonomic expert.

| Dataset          | Total N | Accurate identifications, any taxonomic level (%) | Accurate identifications, species-level (%) | Over-confidently identified observations (%) | Under-confidently identified observations (%) |
|------------------|---------|---------------------------------------------------|---------------------------------------------|----------------------------------------------|-----------------------------------------------|
| Canada           | 300     | 94.9                                              | 98.3                                        | 2.1                                          | 27.3                                          |
| Northeastern USA | 400     | 94.9                                              | 94.9                                        | 8.4                                          | 10.5                                          |

**Table S2.** Accuracy, overconfidence (observations identified to a lower taxonomic level than is possible with a photograph) and underconfidence (observations identified at a higher taxonomic level than possible with a photograph) of subsamples of observations from the filtered Canadian and USA datasets (see Methods), as determined by a taxonomic expert.

| Dataset                     | Total N | Accurate identifications, genus-level (%) | Accurate identifications, species-level (%) | Overconfidently identified observations (%) | Underconfidently identified observations (%) |
|-----------------------------|---------|-------------------------------------------|---------------------------------------------|---------------------------------------------|----------------------------------------------|
| Canada (filtered)           | 266     | 92.0                                      | 100.0                                       | 1.9                                         | 20.3                                         |
| Northeastern USA (filtered) | 377     | 93.8                                      | 94.6                                        | 6.7                                         | 5.0                                          |

**Table S3.** Observations of Scarabaeidae within the geographic range of *I. aldrichi* with candidate parasitoid eggs that have dissimilar morphology to *I. aldrichi* eggs.

| Subfamily     | Identification                                      | Date observed  | Location (GPS)    | iNaturalist observation number (with hyperlink) |
|---------------|-----------------------------------------------------|----------------|-------------------|-------------------------------------------------|
| Rutelinae     | <i>Pelidnota punctata</i> (Linnaeus)                | July 19, 2022  | 42.5947, -72.2289 | <a href="#">127054324</a>                       |
| Melolonthinae | <i>Diplotaxis</i> sp.                               | May 29, 2020   | 43.9408, -72.3253 | <a href="#">47806012</a>                        |
| Melolonthinae | <i>Diplotaxis tristis</i> Kirby <sup>a</sup>        | August 4, 2022 | 44.2522, -68.3673 | <a href="#">179760601</a>                       |
| Melolonthinae | <i>Hoplia</i> sp.                                   | May 21, 2021   | 43.6211, -72.5075 | <a href="#">80394914</a>                        |
| Melolonthinae | <i>Hoplia</i> sp.                                   | May 21, 2022   | 43.5965, -72.6096 | <a href="#">118019183</a>                       |
| Melolonthinae | <i>Hoplia trifasciata</i> Say <sup>a</sup>          | June 10, 2018  | 43.7517, -72.3689 | <a href="#">13302726</a>                        |
| Melolonthinae | <i>Hoplia trifasciata</i> Say <sup>a</sup>          | June 16, 2018  | 42.2236, -74.1268 | <a href="#">16230880</a>                        |
| Melolonthinae | <i>Hoplia trifasciata</i> Say <sup>a</sup>          | May 26, 2021   | 46.3967, -72.6028 | <a href="#">80403354</a>                        |
| Melolonthinae | <i>Hoplia trifasciata</i> Say <sup>a</sup>          | May 26, 2021   | 46.3967, -72.6028 | <a href="#">80403554</a>                        |
| Melolonthinae | <i>Hoplia trifasciata</i> Say <sup>a</sup>          | May 25, 2022   | 44.1120, -72.8559 | <a href="#">118678319</a>                       |
| Melolonthinae | <i>Phyllophaga rugosa</i> (Melsheimer) <sup>a</sup> | June 5, 2020   | 44.2003, -79.4752 | <a href="#">48579161</a>                        |
| Melolonthinae | <i>Phyllophaga</i> sp.                              | May 28, 2018   | 44.9974, -78.4508 | <a href="#">12911643</a>                        |
| Melolonthinae | <i>Phyllophaga</i> sp.                              | June 2, 2019   | 42.1944, -74.1728 | <a href="#">26263791</a>                        |
| Melolonthinae | <i>Phyllophaga</i> sp.                              | June 10, 2019  | 45.5495, -78.6357 | <a href="#">26753323</a>                        |
| Melolonthinae | <i>Phyllophaga</i> sp.                              | June 3, 2020   | 45.2001, -77.9247 | <a href="#">48336993</a>                        |
| Melolonthinae | <i>Phyllophaga</i> sp.                              | June 3, 2020   | 43.3603, -79.9349 | <a href="#">71607185</a>                        |
| Melolonthinae | <i>Phyllophaga</i> sp.                              | May 19, 2021   | 44.9033, -71.4838 | <a href="#">79415822</a>                        |
| Melolonthinae | <i>Phyllophaga</i> sp.                              | May 21, 2021   | 46.3967, -72.6028 | <a href="#">79715961</a>                        |
| Melolonthinae | <i>Phyllophaga</i> sp.                              | May 21, 2021   | 45.4539, -75.6557 | <a href="#">79873121</a>                        |
| Melolonthinae | <i>Phyllophaga</i> sp.                              | May 20, 2022   | 43.5931, -72.3368 | <a href="#">117956364</a>                       |
| Melolonthinae | <i>Phyllophaga</i> sp.                              | May 31, 2022   | 44.9728, -78.2747 | <a href="#">119573203</a>                       |
| Melolonthinae | <i>Phyllophaga</i> sp. <sup>a</sup>                 | June 7, 2022   | 44.6889, -77.2124 | <a href="#">122122998</a>                       |
| Melolonthinae | <i>Serica sericea</i> (Illiger) <sup>a</sup>        | June 16, 2020  | 44.3974, -79.5402 | <a href="#">52319898</a>                        |
| Melolonthinae | <i>Serica sericea</i> (Illiger) <sup>a</sup>        | June 10, 2021  | 46.3967, -72.6028 | <a href="#">82520847</a>                        |
| Melolonthinae | <i>Serica</i> sp.                                   | June 13, 2021  | 44.2681, -77.5086 | <a href="#">82884608</a>                        |
| Melolonthinae | <i>Serica</i> sp.                                   | June 22, 2021  | 44.9467, -75.7225 | <a href="#">86223270</a>                        |
| Melolonthinae | <i>Serica</i> sp.                                   | June 6, 2022   | 45.5423, -75.7948 | <a href="#">122988367</a>                       |
| Melolonthinae | <i>Serica</i> sp.                                   | June 26, 2022  | 45.9280, -73.5303 | <a href="#">123479759</a>                       |
| Melolonthinae | <i>Serica</i> sp. <sup>a</sup>                      | June 25, 2022  | 45.5082, -75.4550 | <a href="#">123555629</a>                       |

<sup>a</sup> A.B.T Smith corrected or improved on these identifications from identifications previously made on iNaturalist.org *a posteriori* (i.e, after January 10, 2025).

**Table S4.** Observations of selected non-target Scarabaeidae species (i.e., species that were found to have candidate *I. aldrichi* eggs on them in the northeastern North American survey; see Table 1) from an area of Minnesota and Wisconsin (delimiting latitudes: 43.5565, 46.4908; delimiting longitudes: -94.2222, -89.5091) where a project on iNaturalist, the Midwest Winsome Fly Survey (<https://www.inaturalist.org/projects/midwest-winsome-fly-survey>) has documented the distribution of *I. aldrichi* following its redistribution to Minnesota from 1998 to 2006 (Hutchinson et al. 2024). Observations were inspected in January 2025.

| Species                   | Total number of records | Number of records of sufficient quality <sup>a</sup> | Number of records with <i>I. aldrichi</i> -like eggs (% of observations) <sup>b</sup> |
|---------------------------|-------------------------|------------------------------------------------------|---------------------------------------------------------------------------------------|
| <i>Popillia japonica</i>  | 2,371                   | 2,306                                                | 335 (14.5%)                                                                           |
| <i>Cotalpa lanigera</i>   | 90                      | 89                                                   | 1 (1.1%) <sup>c</sup>                                                                 |
| <i>Pelidnota punctata</i> | 349                     | 331                                                  | 0 (0.0%)                                                                              |
| <i>Hoplia</i> sp.         | 43                      | 42                                                   | 0 (0.0%)                                                                              |

<sup>a</sup> Photographs that were sufficiently clear to observe whether or not there was a candidate parasitoid egg, were not obvious misidentifications, and depicted whole adult beetles with at least some of their pronotum area visible.

<sup>b</sup> Of observations that are sufficient quality.

<sup>c</sup> Observation made on May 31, 2021 by iNaturalist user safechrislaurie; [#81170711](#).
